# Supplementary material for: The Calpain-7 protease functions together with the ESCRT-III protein IST1 within the midbody to regulate the timing and completion of abscission
Source: eLife journal article supplement (doi:10.7554/elife.84515), 2023-09-29

**A**CAPN7<sub>4-68</sub>IST1<sub>324-332</sub>CHMP6<sub>168-179</sub>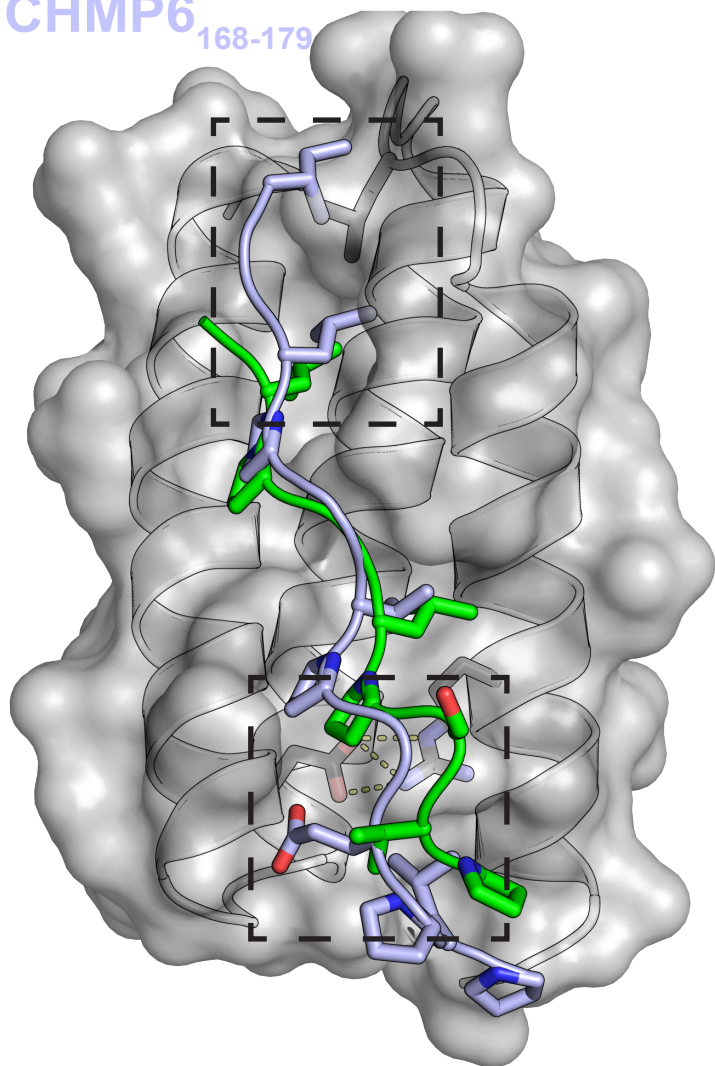

Consensus MIM2:  $\Phi$ PX $\Phi$ PXXP $\Phi$ P  
 IST1 MIM2: <sub>323</sub>FVLPELPSVPD<sub>336</sub>TLP  
 CHMP6 MIM2: <sub>168</sub>IELPEVPSEPLPEK<sub>181</sub>

**B**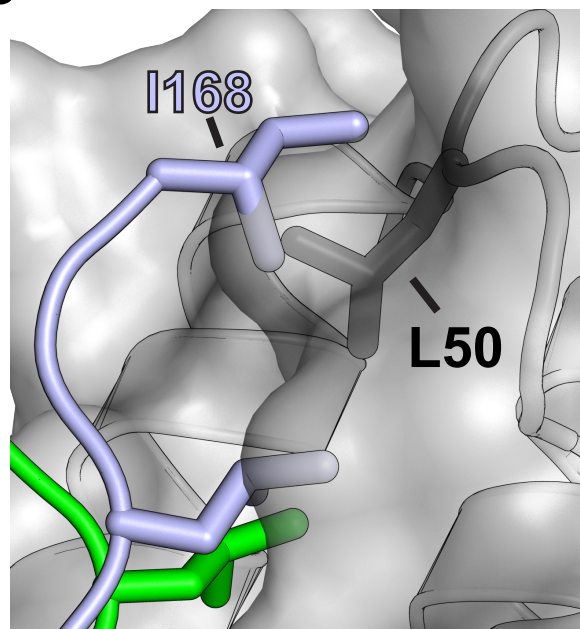**C**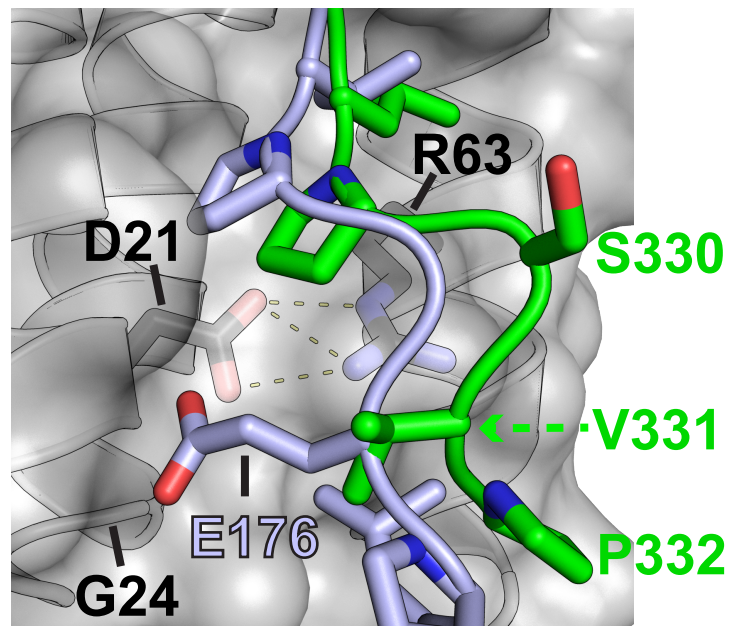

Supplement: supp [file elife-84515-supp-v1.zip]
