# Supplementary material for: The Calpain-7 protease functions together with the ESCRT-III protein IST1 within the midbody to regulate the timing and completion of abscission
Source: eLife journal article supplement (doi:10.7554/elife.84515), 2023-09-29
Supplement: supp [file elife-84515-supp-v1.zip]

Fraction Bound

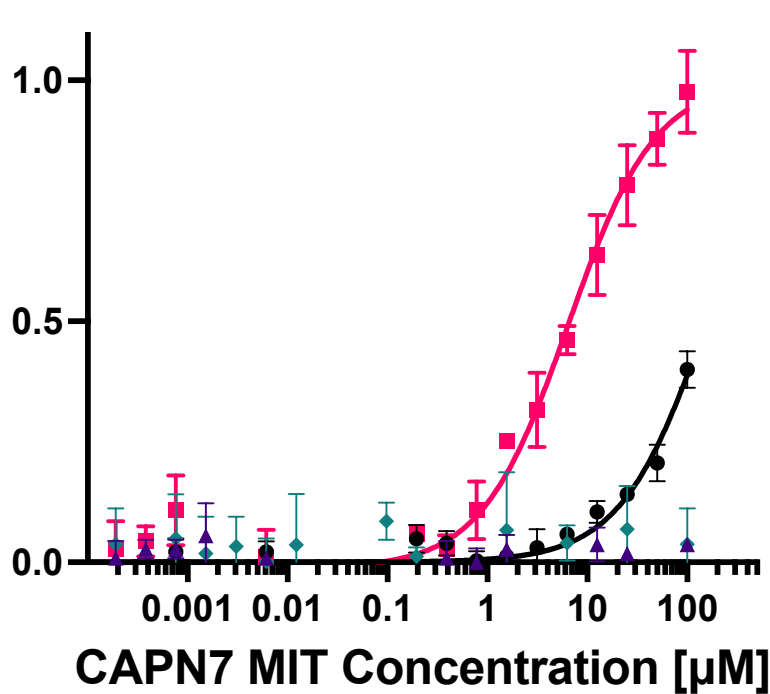

$K_D$  ( $\mu\text{M}$ )

- CAPN7<sub>81-165</sub> + IST1<sub>344-366</sub>  
 $6 \pm 1$
- CAPN7<sub>1-75</sub> + IST1<sub>316-343</sub>  
>100
- ◆ CAPN7<sub>1-75</sub> + IST1<sub>344-366</sub>  
ND
- ▲ CAPN7<sub>81-165</sub> + IST1<sub>316-343</sub>  
ND
