# Supplementary material for: The Calpain-7 protease functions together with the ESCRT-III protein IST1 within the midbody to regulate the timing and completion of abscission
Source: eLife journal article supplement (doi:10.7554/elife.84515), 2023-09-29

**A**

siRNA 1: NT ——— CAPN7 ———

siRNA 2:

Rescue Construct: mCh mCh WT V18D F98D C290S

MW 150  
(kDa)

100

75

IB: mCherry

50

37

25

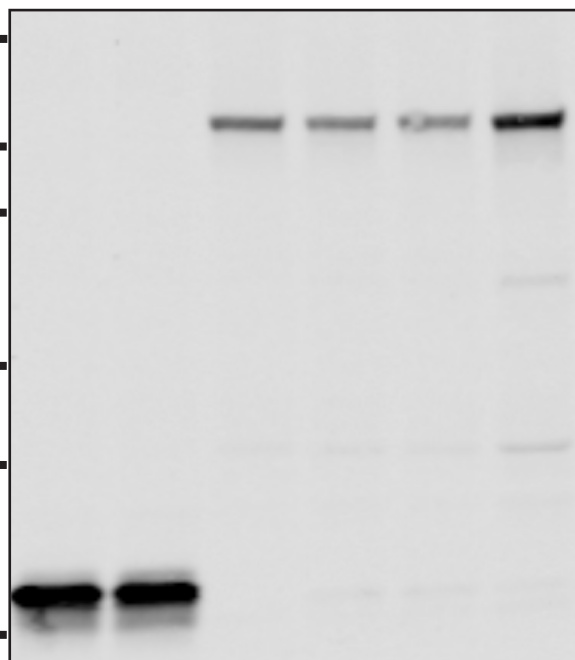

IB: CAPN7

150

100

75

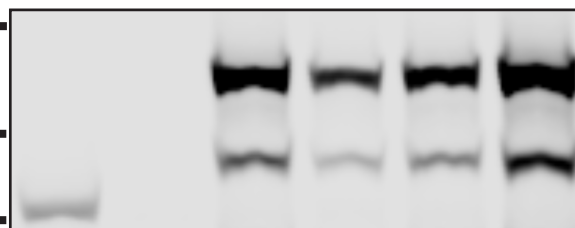

IB: GAPDH

37

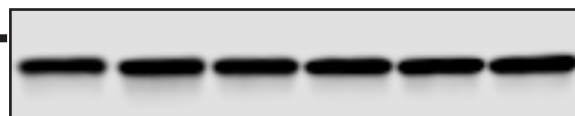

IB: NUP153

150

**B**

NT ——— CAPN7 ———

NT ——— NUP153 ———

mCh mCh WT V18D F98D C290S

CAPN7  
-mCh

mCherry

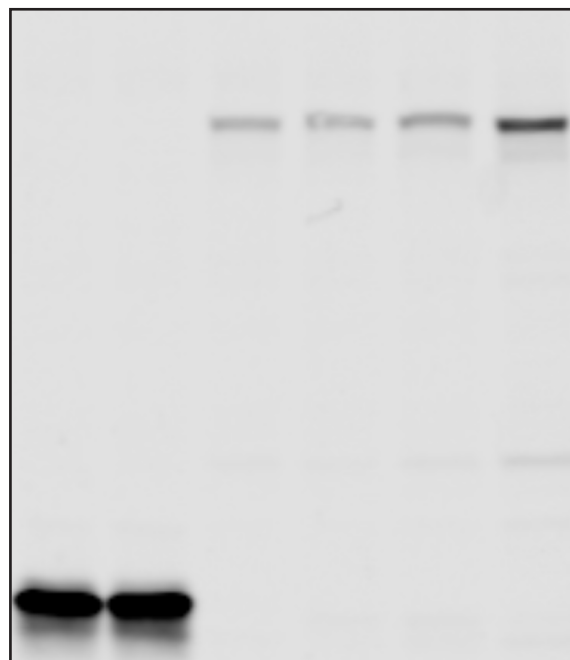CAPN7  
-mChEndog-  
enous  
CAPN7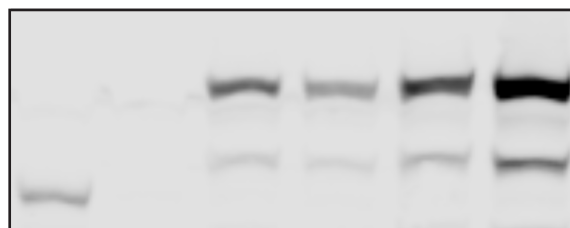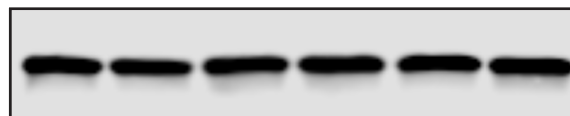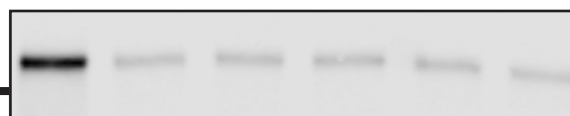

Supplement: supp [file elife-84515-supp-v1.zip]
