# Supplementary material for: The Calpain-7 protease functions together with the ESCRT-III protein IST1 within the midbody to regulate the timing and completion of abscission
Source: eLife journal article supplement (doi:10.7554/elife.84515), 2023-09-29
Supplement: supp [file elife-84515-supp-v1.zip]

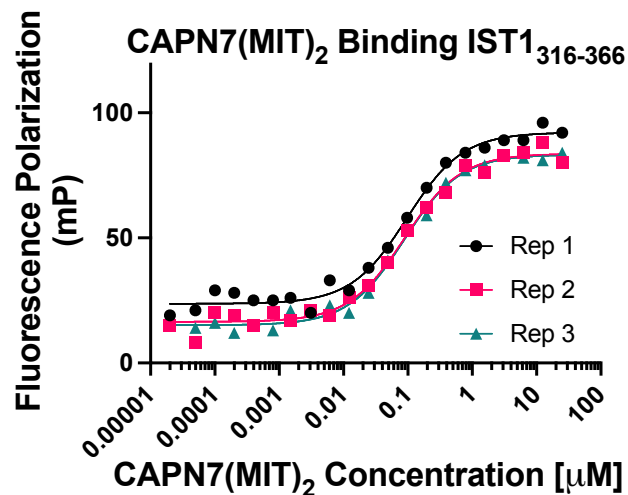

| Best-fit values | K <sub>D</sub> (μM) | Standard Error Mean | 95% Confidence Interval | R squared |
|-----------------|---------------------|---------------------|-------------------------|-----------|
| Rep 1           | 0.097               | 0.012               | 0.075 to 0.12           | 0.990     |
| Rep 2           | 0.09                | 0.011               | 0.069 to 0.12           | 0.989     |
| Rep 3           | 0.087               | 0.009               | 0.070 to 0.11           | 0.993     |

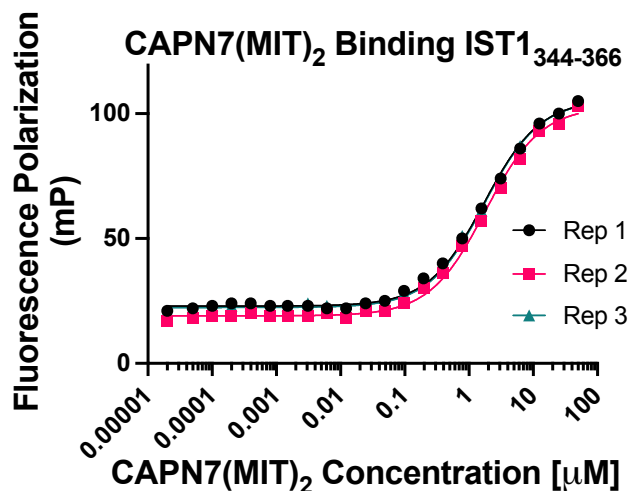

| Best-fit values | K <sub>D</sub> (μM) | Standard Error Mean | 95% Confidence Interval | R squared |
|-----------------|---------------------|---------------------|-------------------------|-----------|
| Rep 1           | 1.72                | 0.089               | 1.54 to 1.93            | 0.998     |
| Rep 2           | 1.79                | 0.109               | 1.57 to 2.05            | 0.997     |
| Rep 3           | 1.74                | 0.099               | 1.53 to 1.96            | 0.997     |

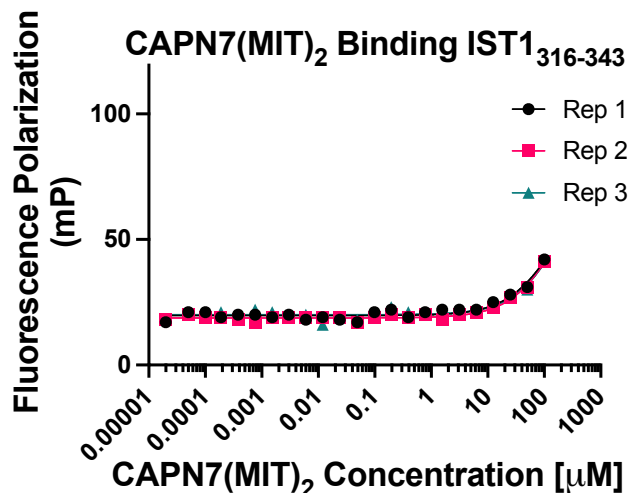

| Best-fit values | K <sub>D</sub> (μM) | Standard Error Mean | 95% Confidence Interval | R squared |
|-----------------|---------------------|---------------------|-------------------------|-----------|
| Rep 1           | 170                 | 100                 | Undefined               | 0.931     |
| Rep 2           | 190                 | 70                  | Undefined               | 0.976     |
| Rep 3           | 240                 | 200                 | Undefined               | 0.911     |
