# Supplementary figures and images for: The Calpain-7 protease functions together with the ESCRT-III protein IST1 within the midbody to regulate the timing and completion of abscission
Source: eLife journal article supplement (doi:10.7554/elife.84515), 2023-09-29

siRNA 1: NT ————— CAPN7 —————

siRNA 2: NT ————— NUP153 —————

Rescue Construct: mCh mCh WT V18D F98D C290S

MW  
(kDa)

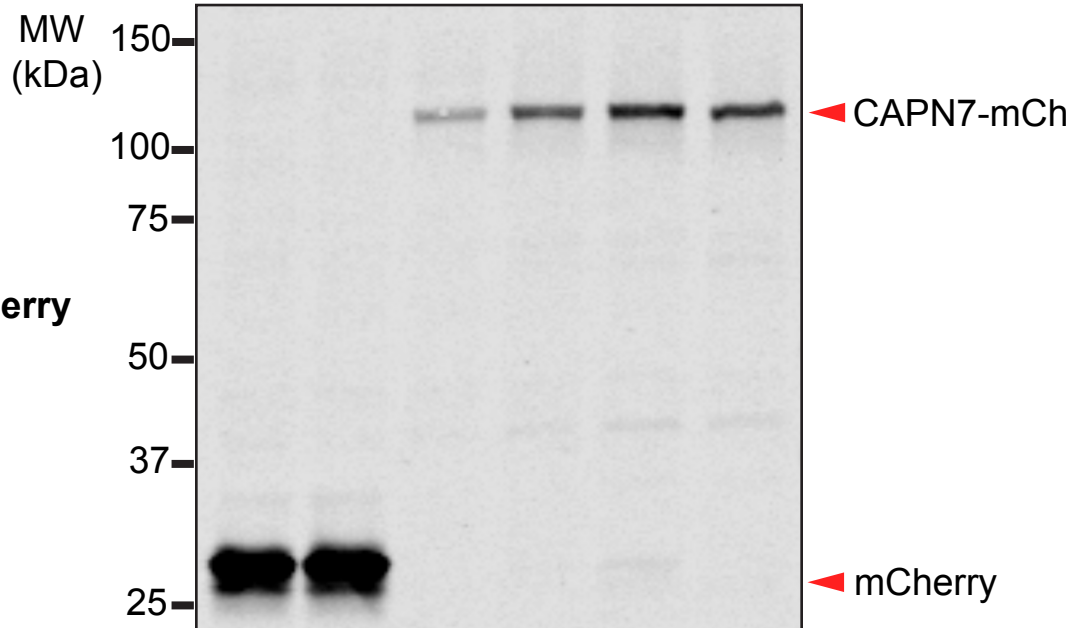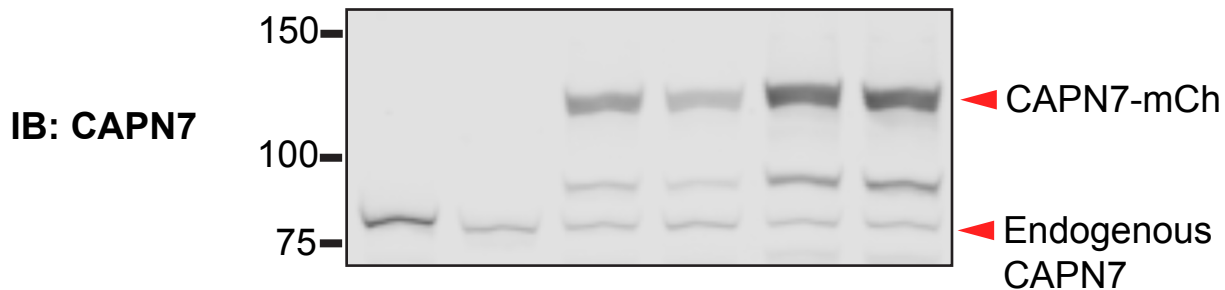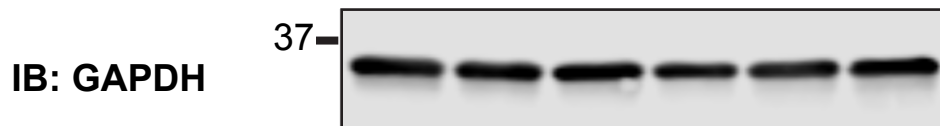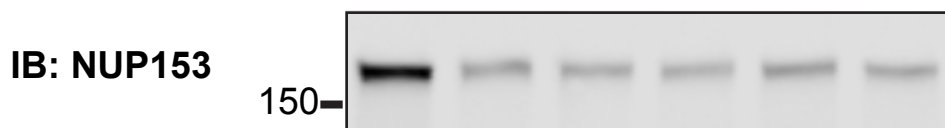

Supplement: supp [file elife-84515-supp-v1.zip]

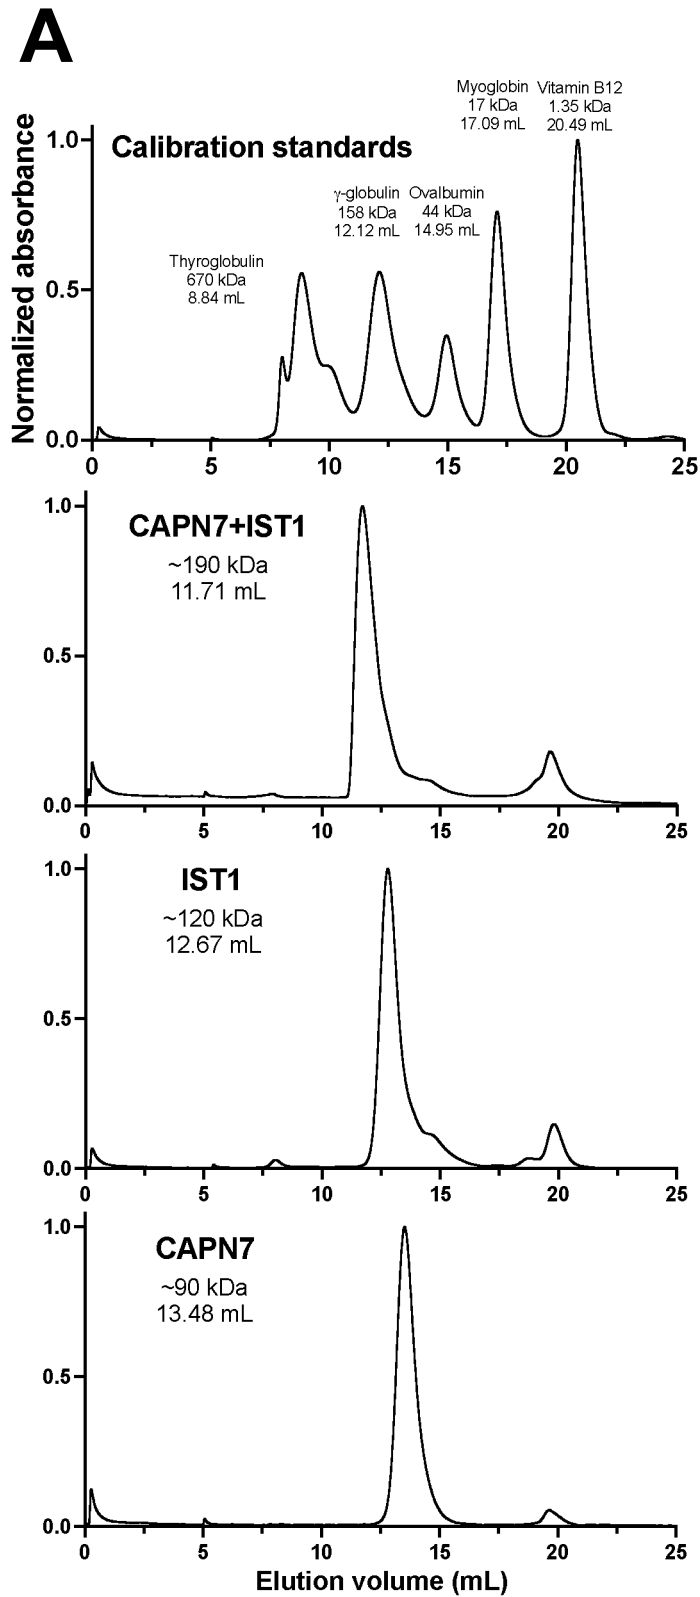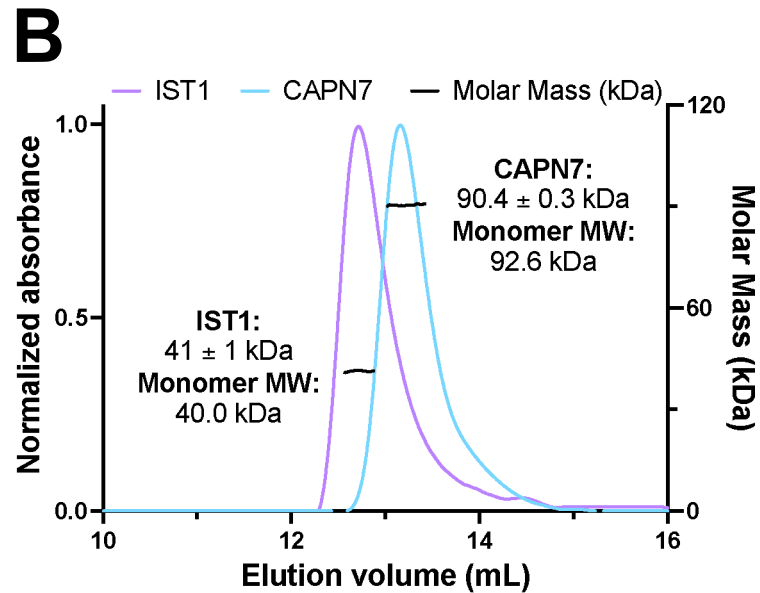

Supplement: supp [file elife-84515-supp-v1.zip]

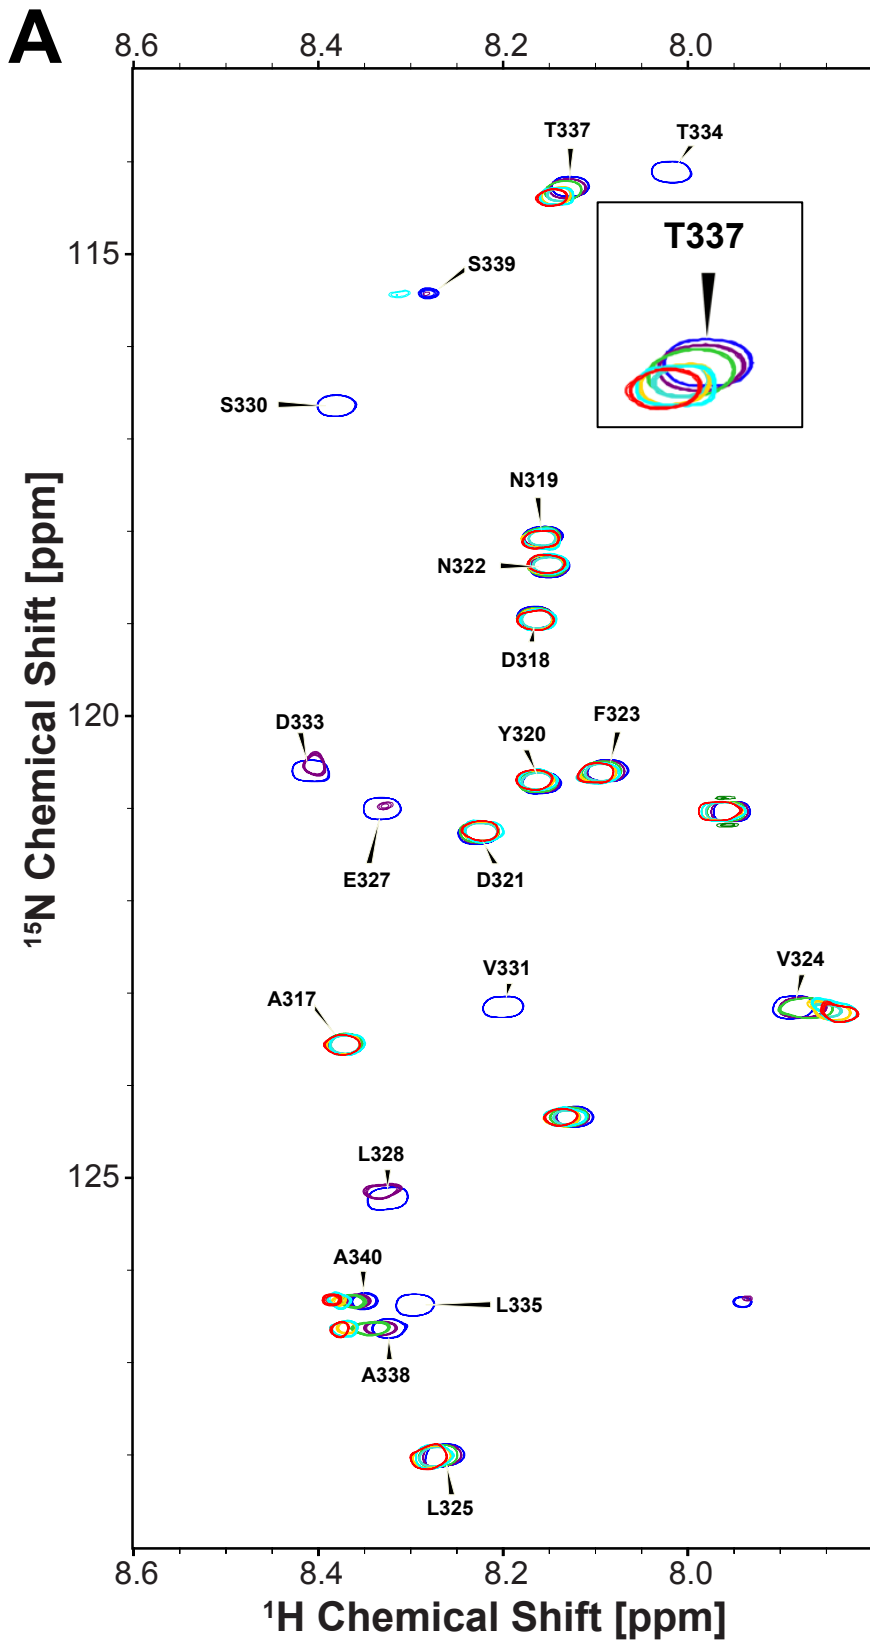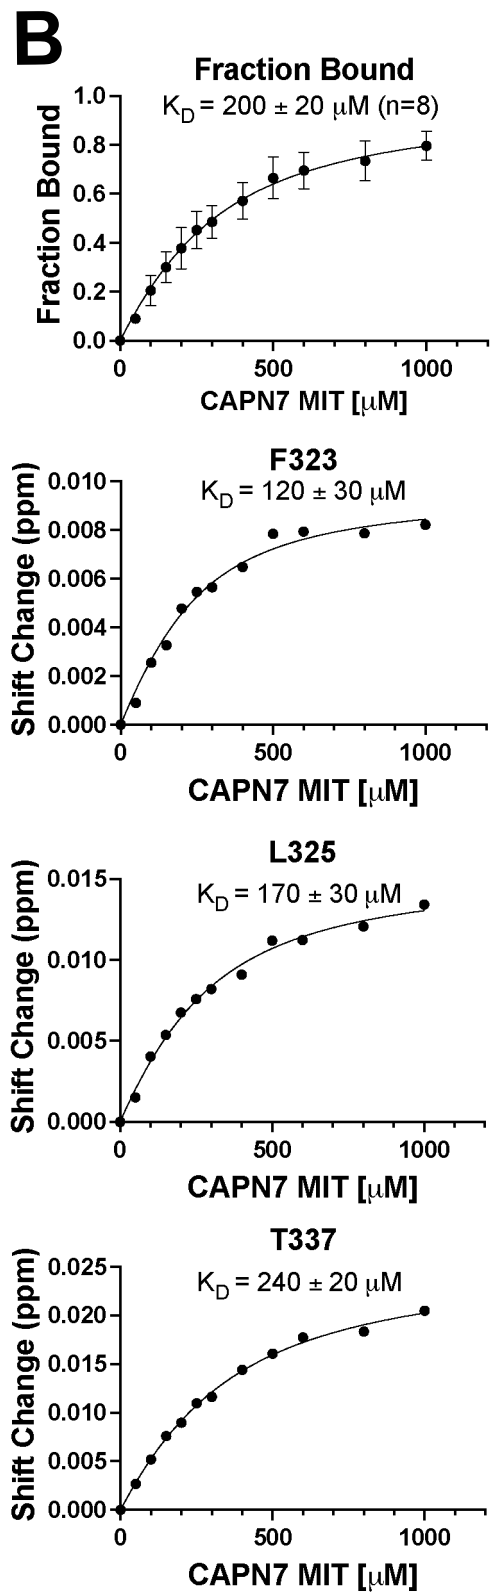

Supplement: supp [file elife-84515-supp-v1.zip]

# A

## Circular Dichroism Spectra

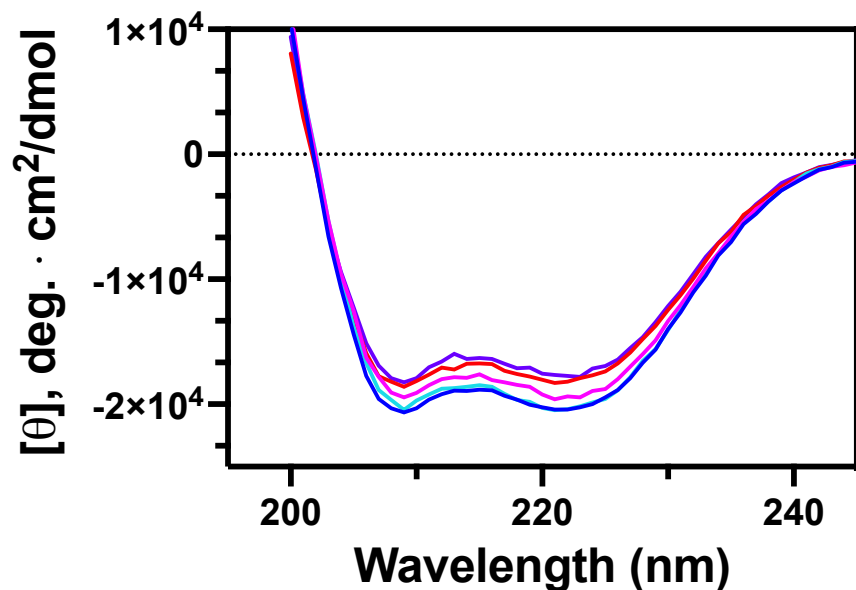

## CAPN7(MIT)<sub>2</sub> Constructs

- WT
- V18D
- L61D
- F98D
- V18D/F98D

# B

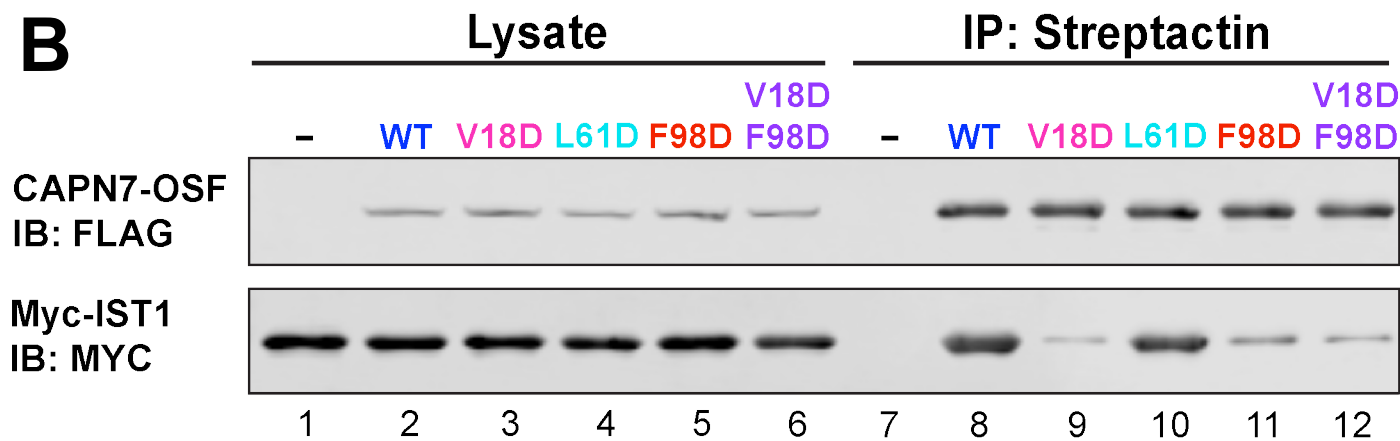

Supplement: supp [file elife-84515-supp-v1.zip]

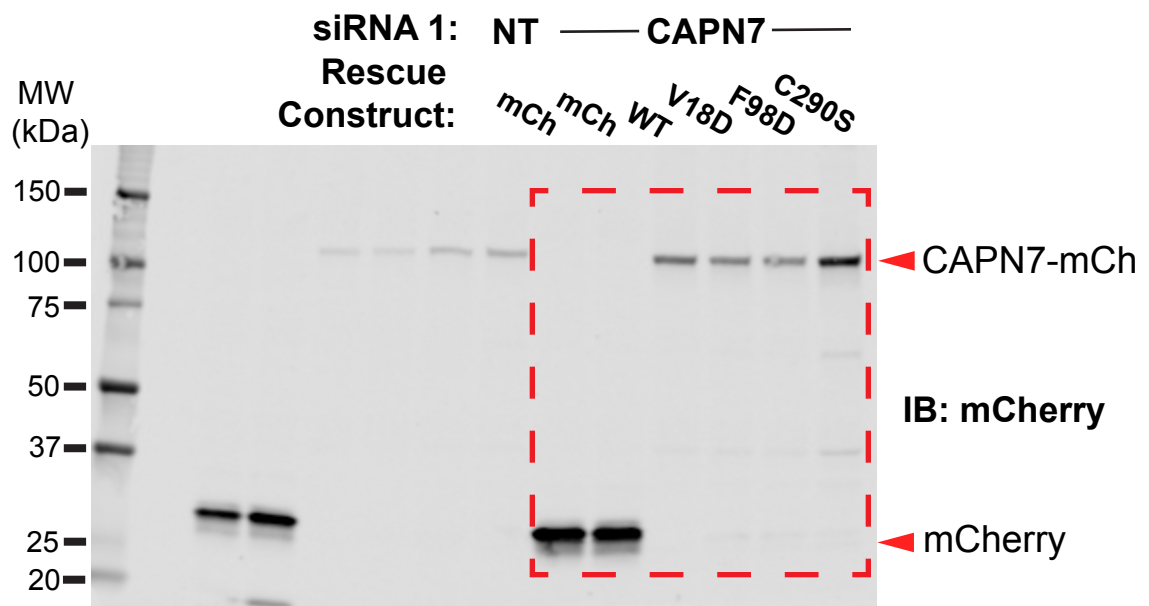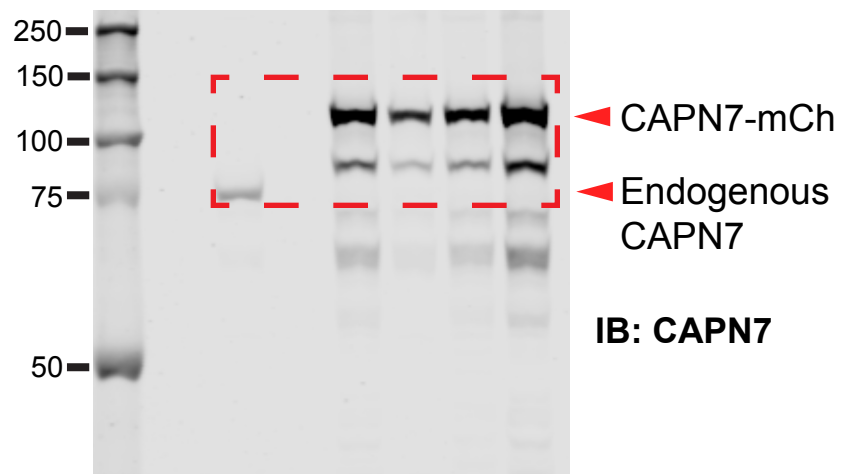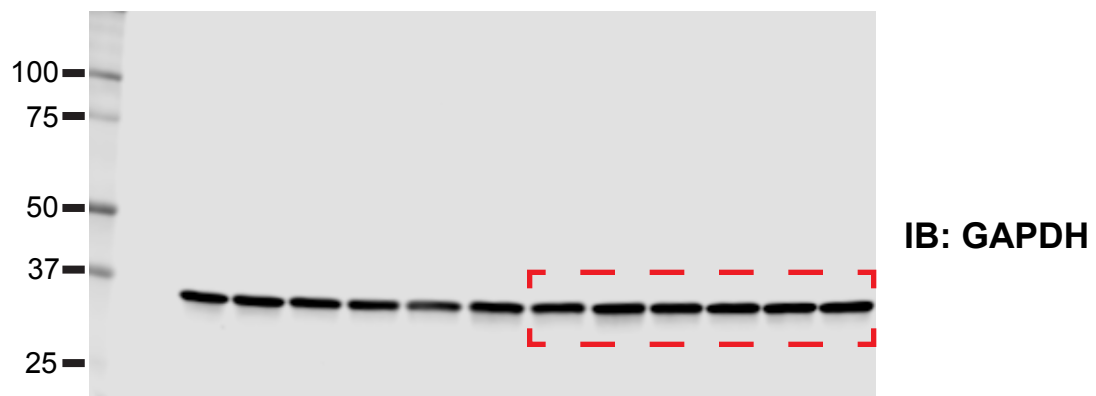

Supplement: supp [file elife-84515-supp-v1.zip]

**A**

CAPN7<sub>4-68</sub>  
IST1<sub>324-332</sub>

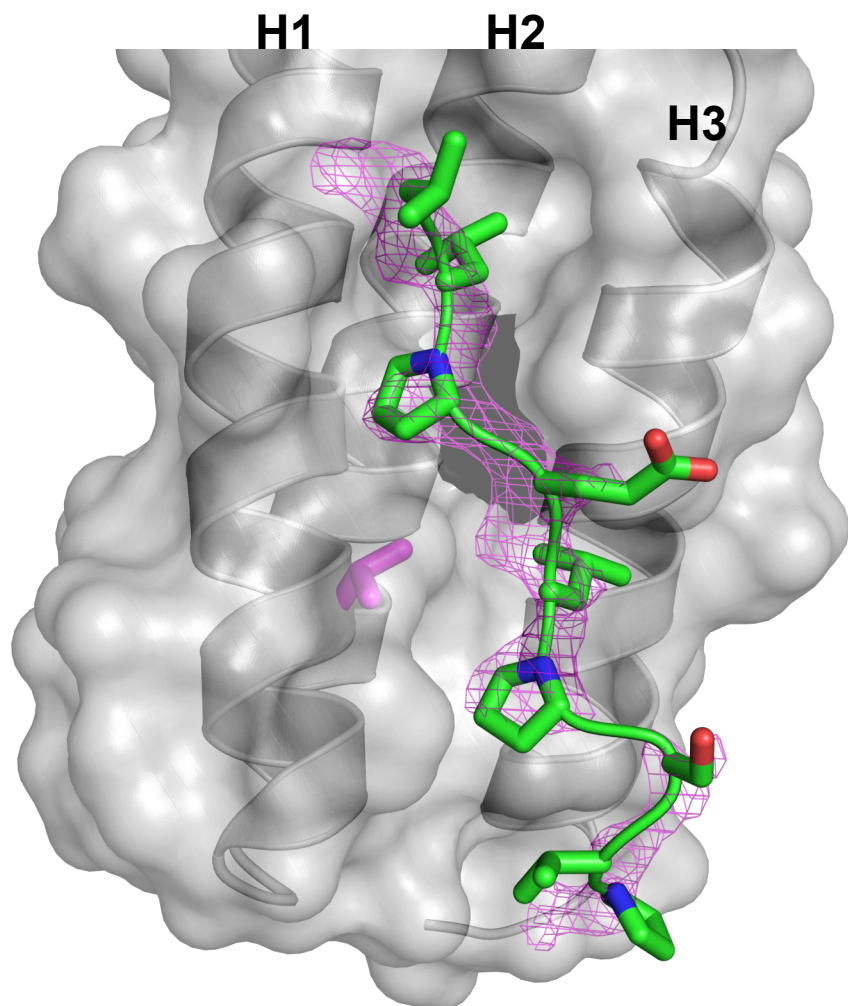**B**

CAPN7<sub>80-150</sub>  
IST1<sub>352-364</sub>

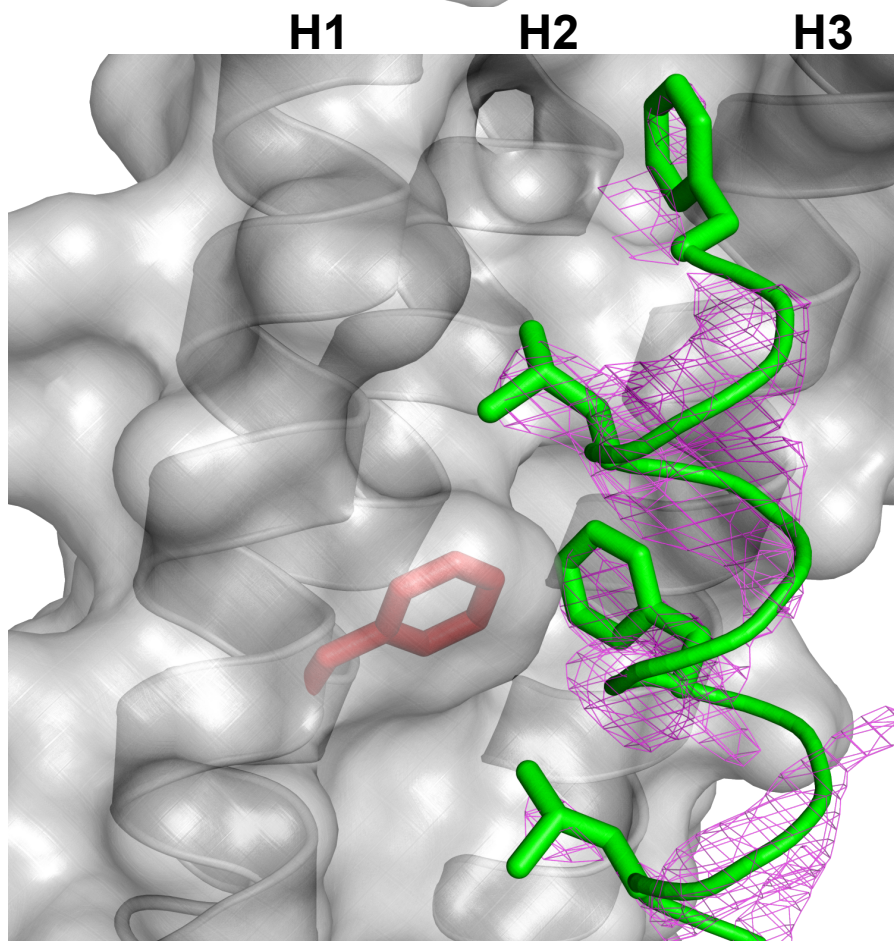

Supplement: supp [file elife-84515-supp-v1.zip]

# CAPN7(MIT)<sub>2</sub> Binding IST1<sub>316-366</sub> constructs

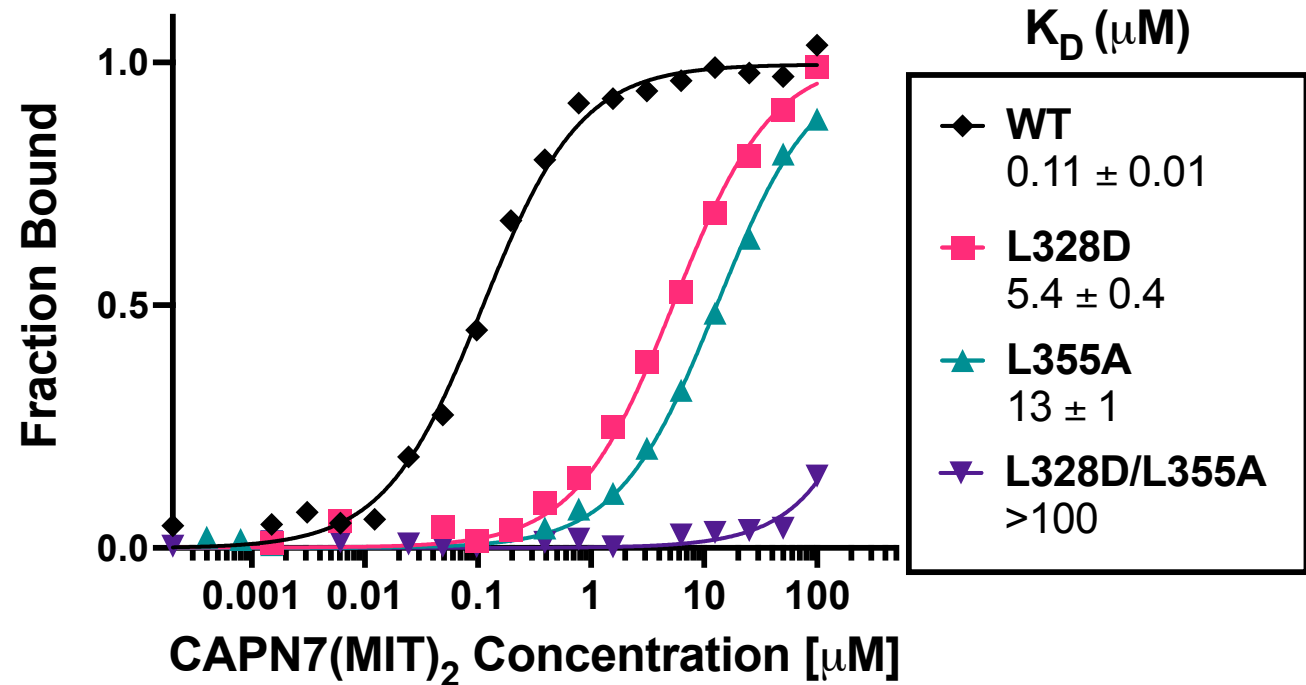

Supplement: supp [file elife-84515-supp-v1.zip]

MW  
(kDa)

250

150

100

75

50

37

25

20

15

10

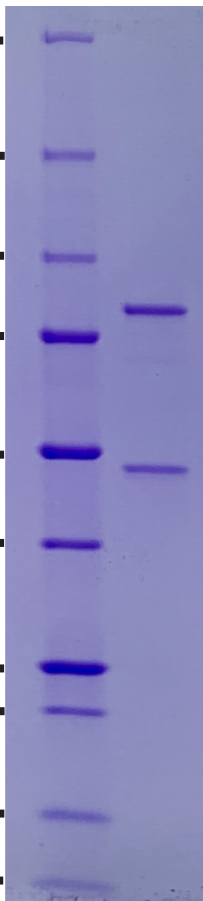

◀ CAPN7

◀ IST1

Supplement: supp [file elife-84515-supp-v1.zip]

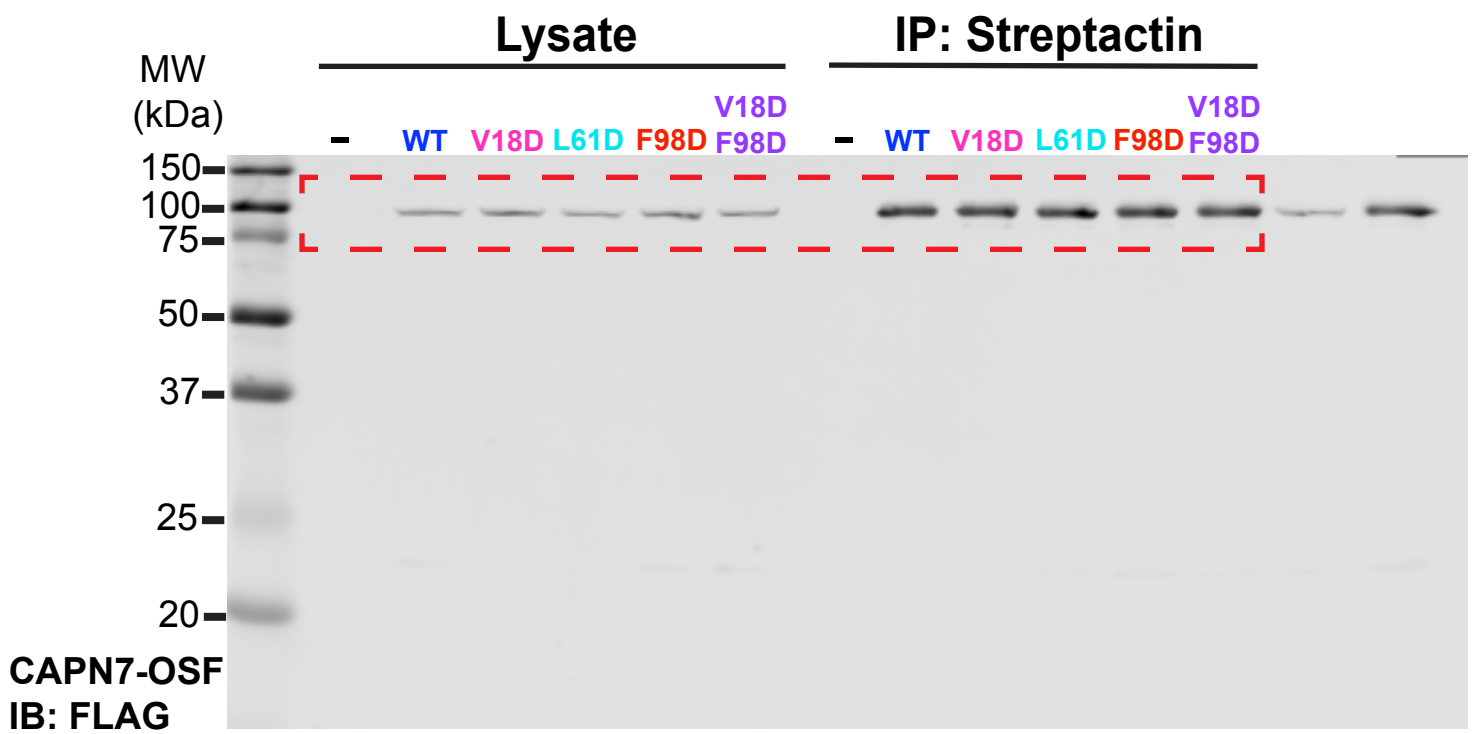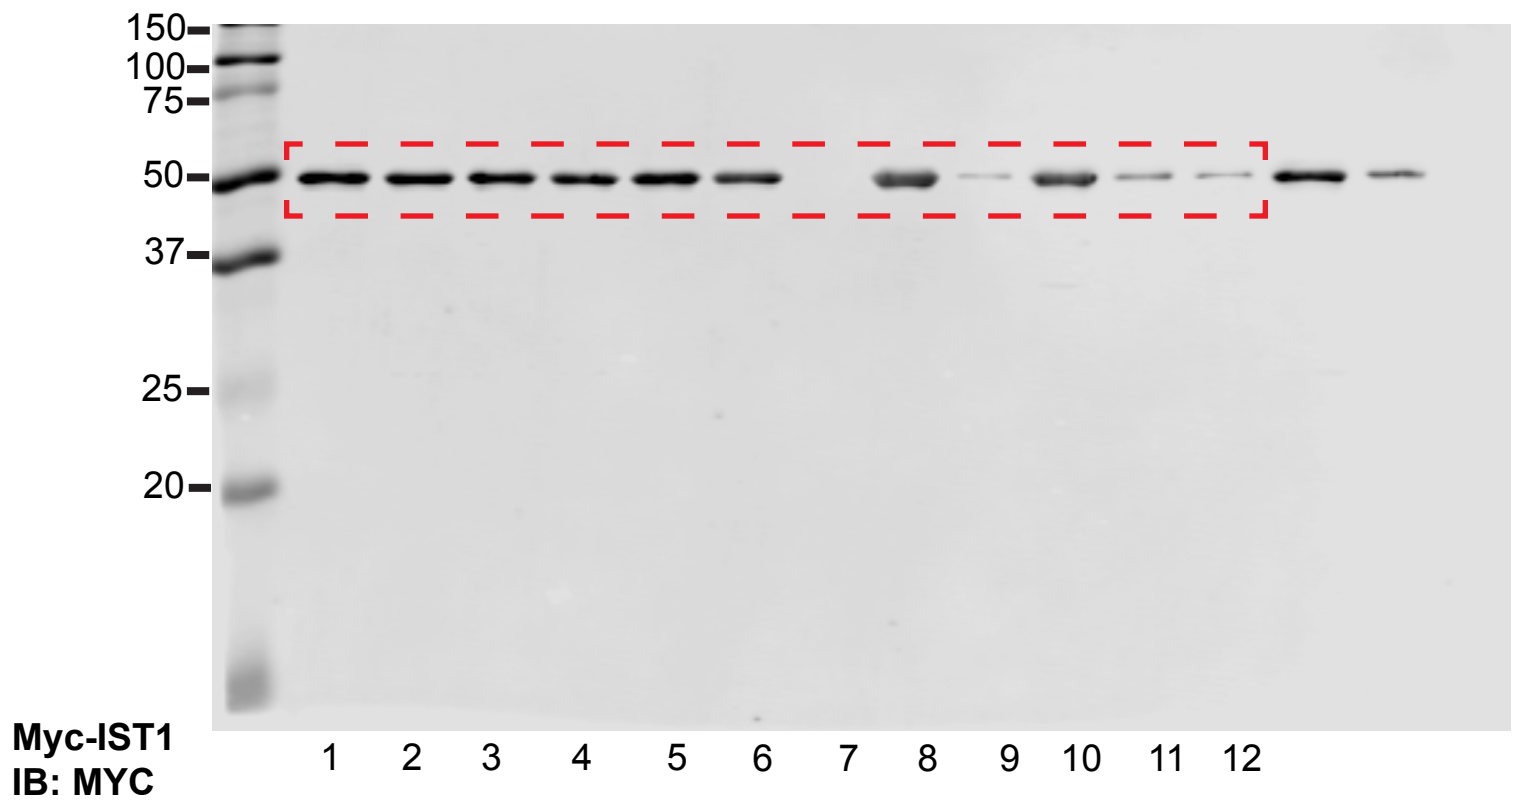

Supplement: supp [file elife-84515-supp-v1.zip]

# CAPN7(MIT)<sub>2</sub> Binding IST1 Constructs

$K_D$  ( $\mu$ M)

◆ IST1<sub>316-366</sub>  
 $0.11 \pm 0.01$

■ IST1<sub>322-366</sub>  
 $0.13 \pm 0.01$

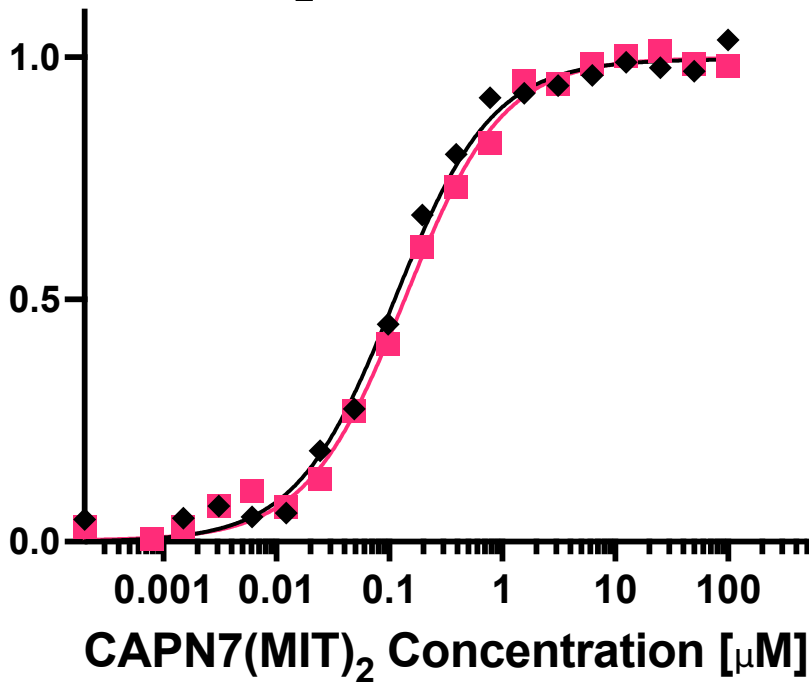

Supplement: supp [file elife-84515-supp-v1.zip]

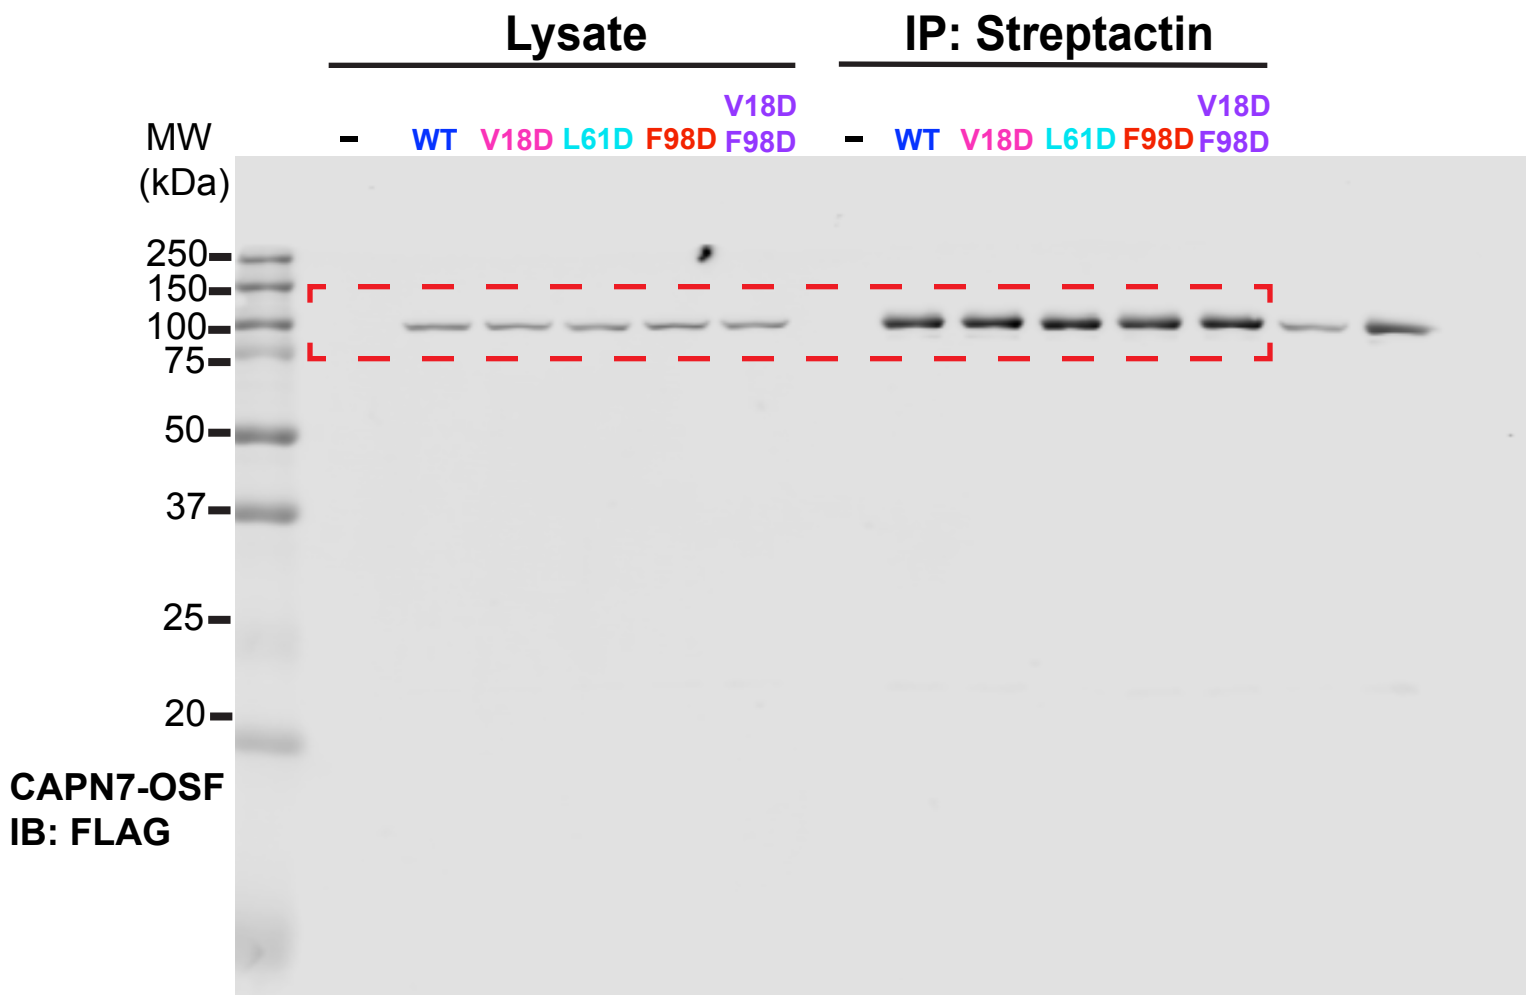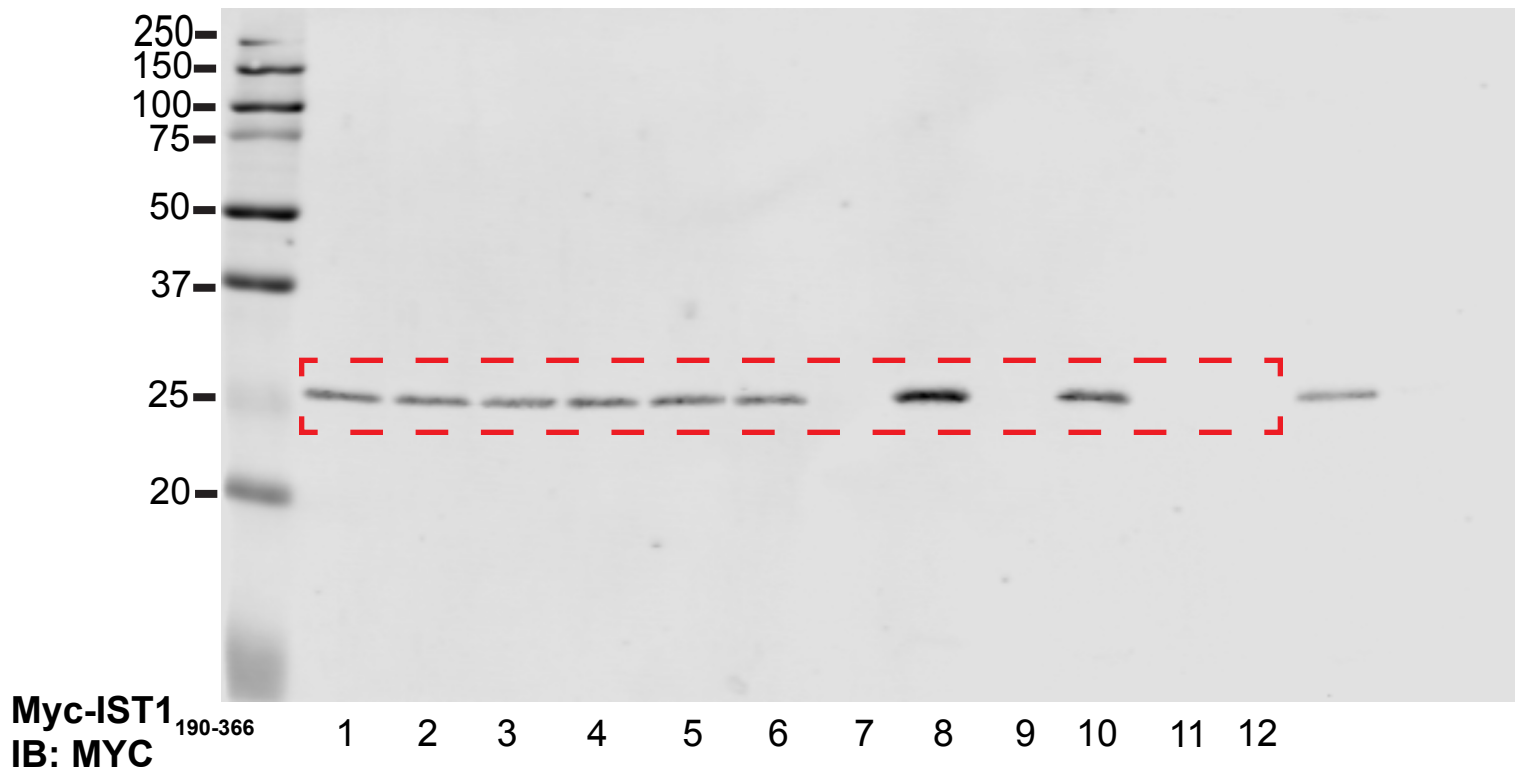

Supplement: supp [file elife-84515-supp-v1.zip]

siRNA 1: NT — CAPN7 —  
 siRNA 2: NT — Nup153 —  
 Rescue Construct: mCh mCh WT V18D F98D C290S

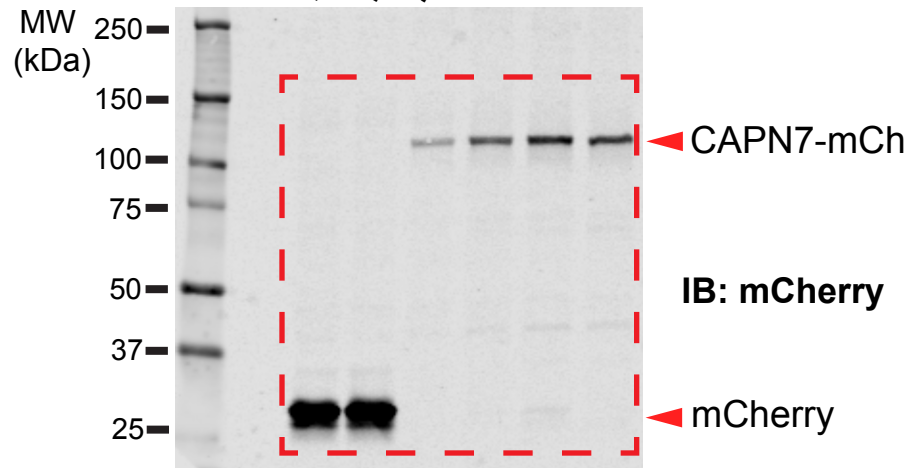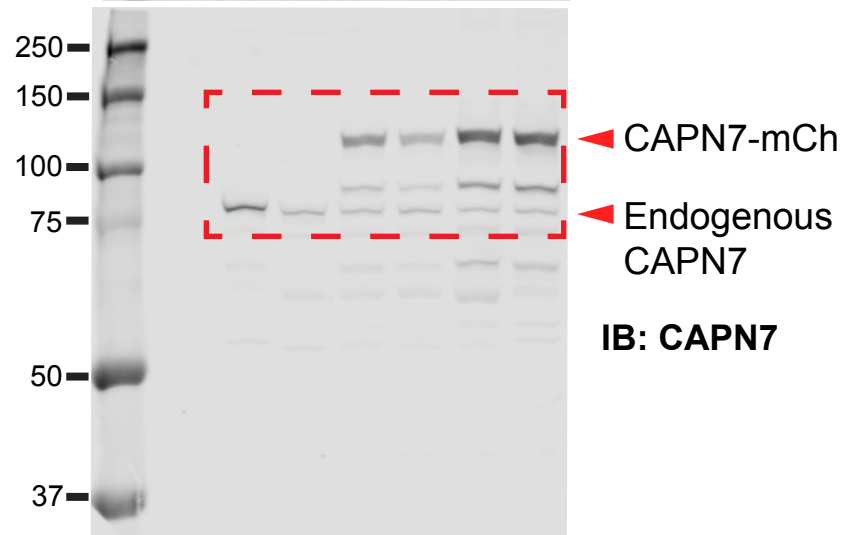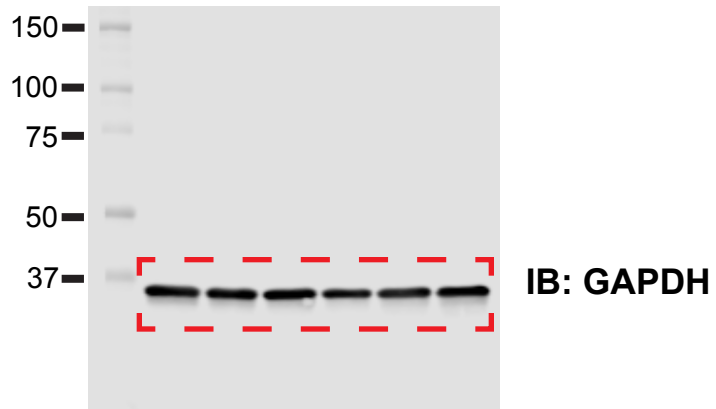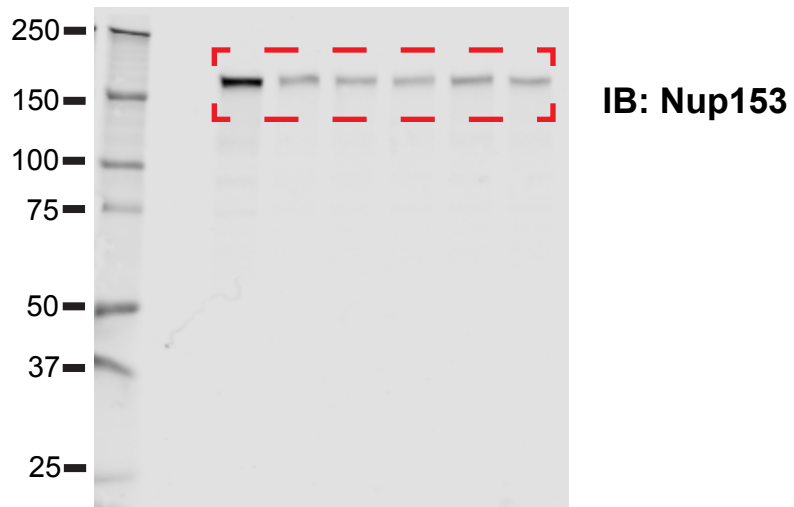

Supplement: supp [file elife-84515-supp-v1.zip]

siRNA 1: NT — CAPN7 —

siRNA 2: NT — Nup153 —

Rescue  
Construct: mCh mCh WT V18D F98D C290S

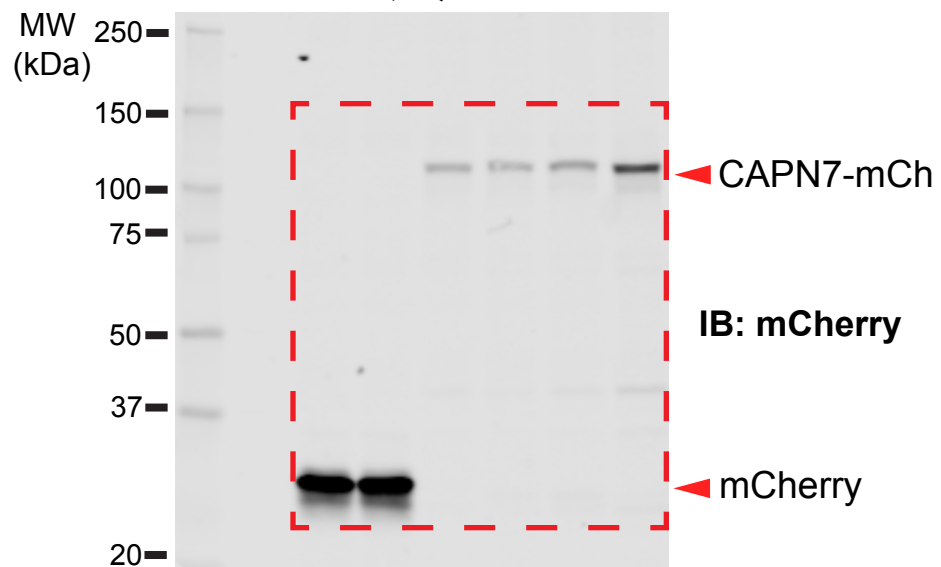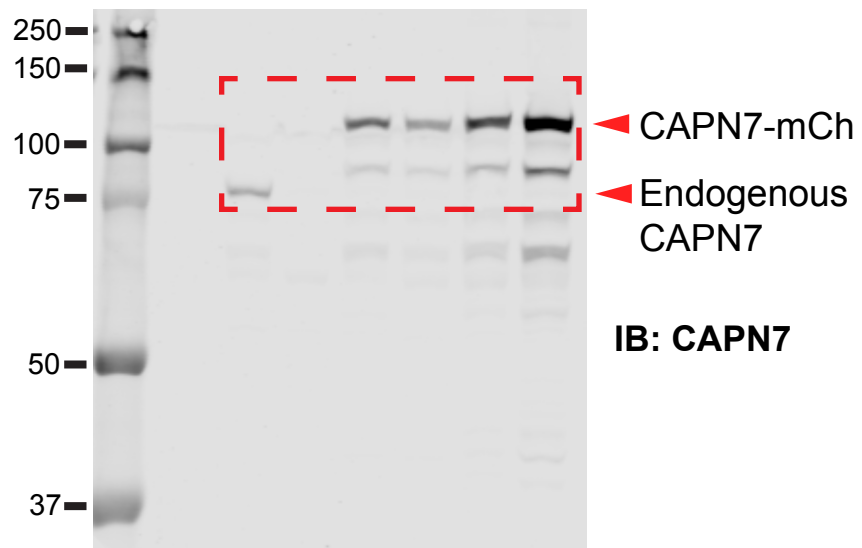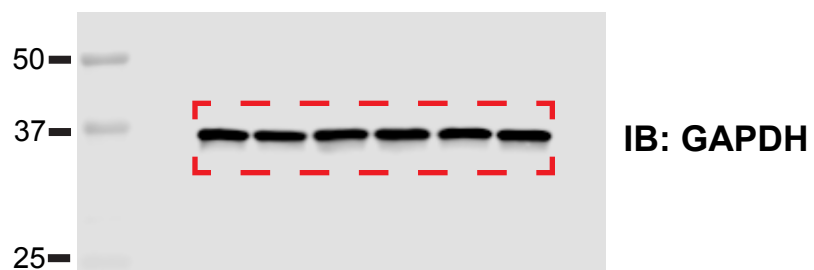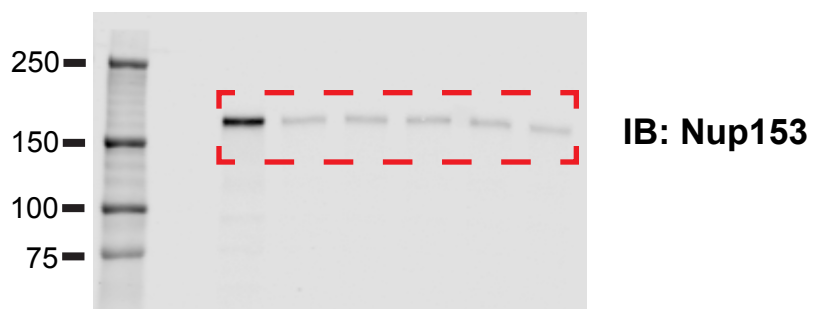

Supplement: supp [file elife-84515-supp-v1.zip]

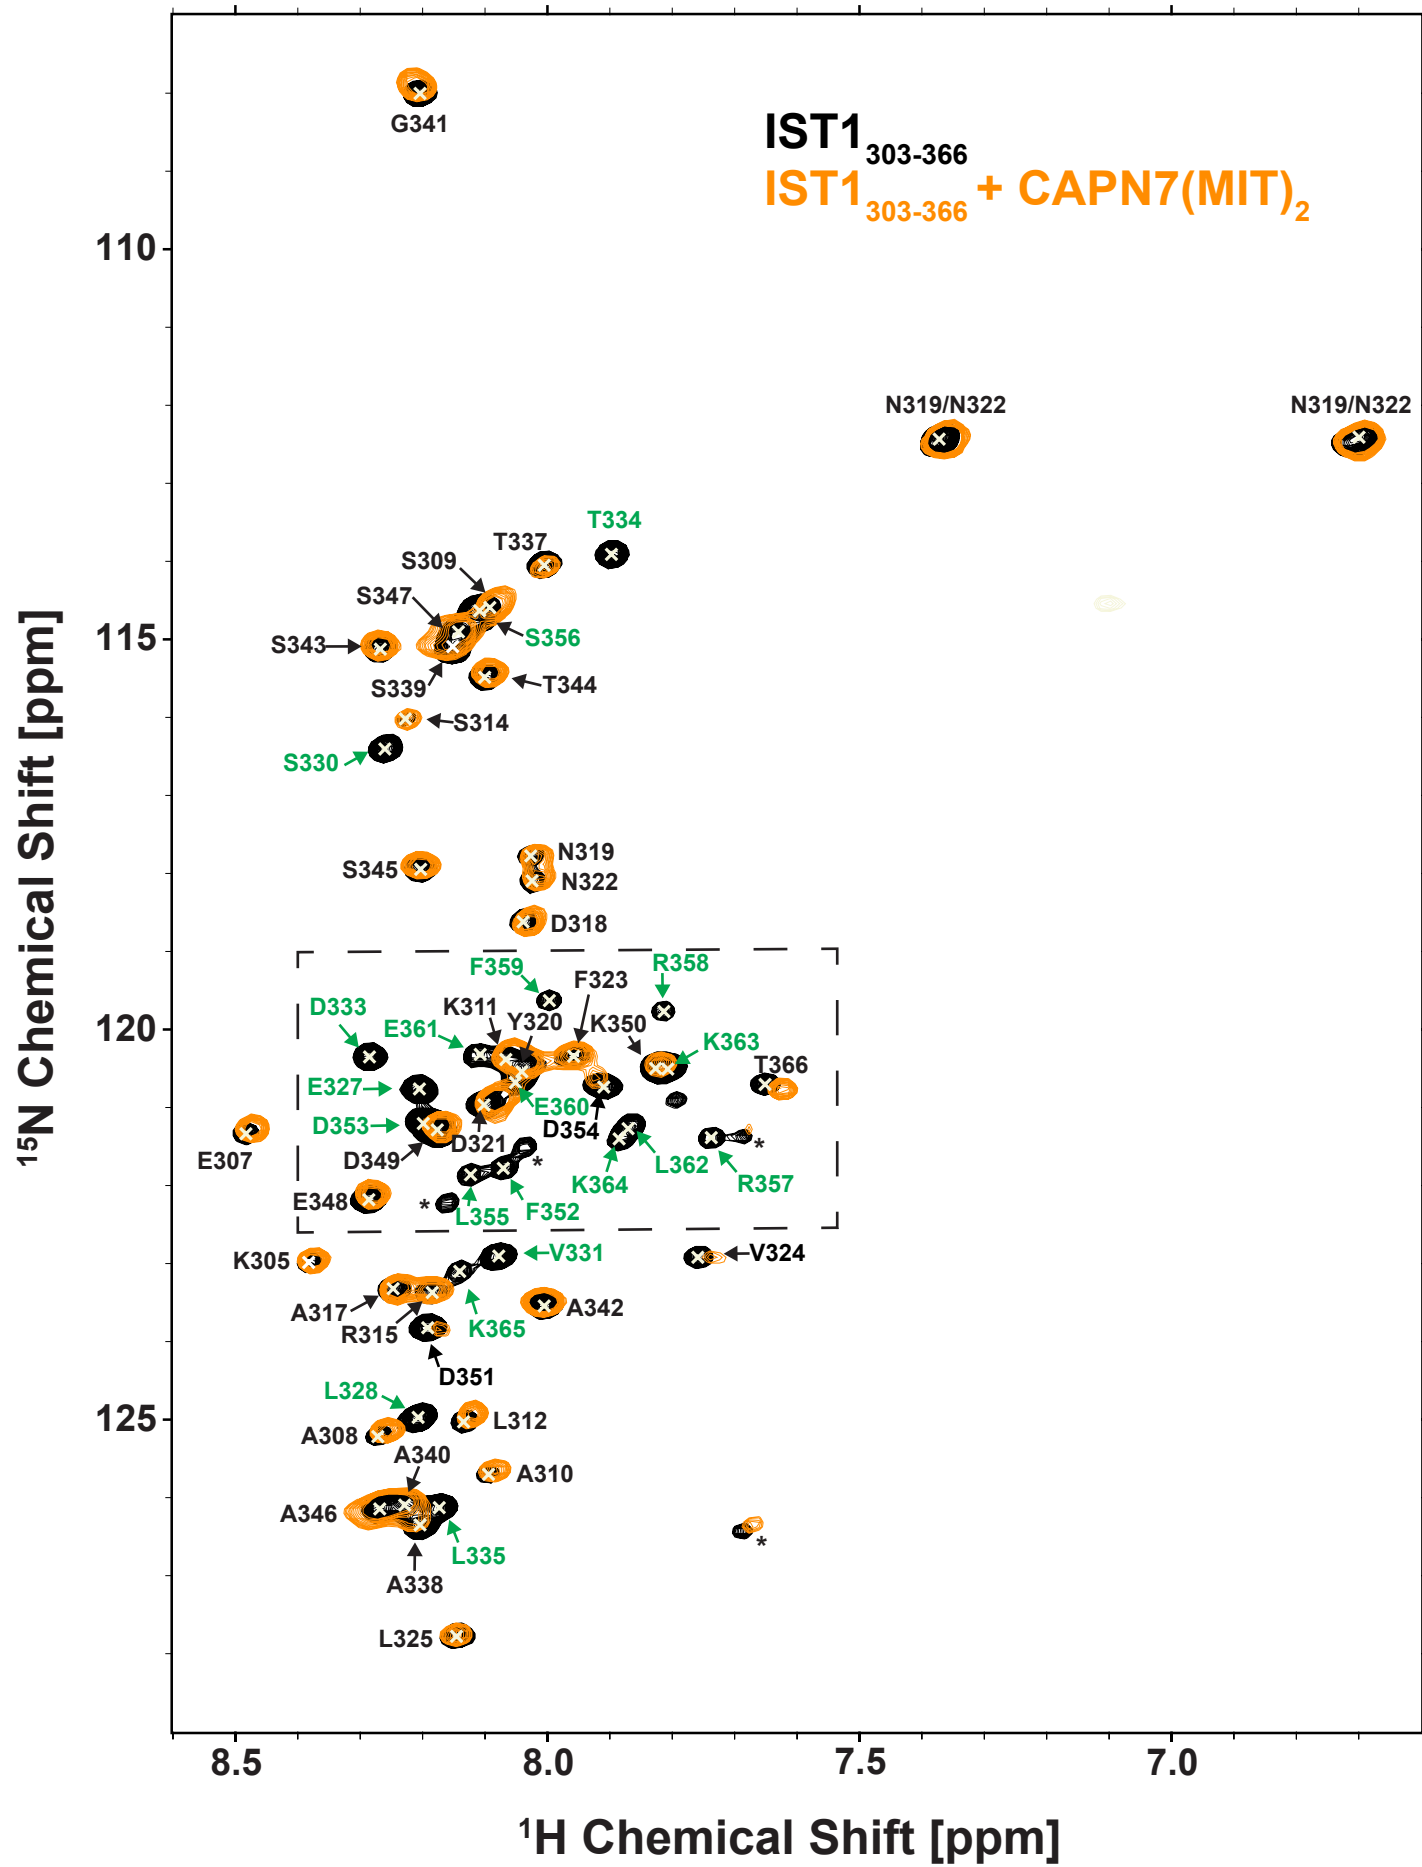

Supplement: supp [file elife-84515-supp-v1.zip]
